# Supplementary material for: Analysis of Differentiated Chemical Components between Zijuan Purple Tea and Yunkang Green Tea by UHPLC-Orbitrap-MS/MS Combined with Chemometrics
Source: MDPI journal article supplement (doi:10.3390/foods10051070), 2021-05-12
Supplement: s1 [file s1]

# Supplrmntary Materials

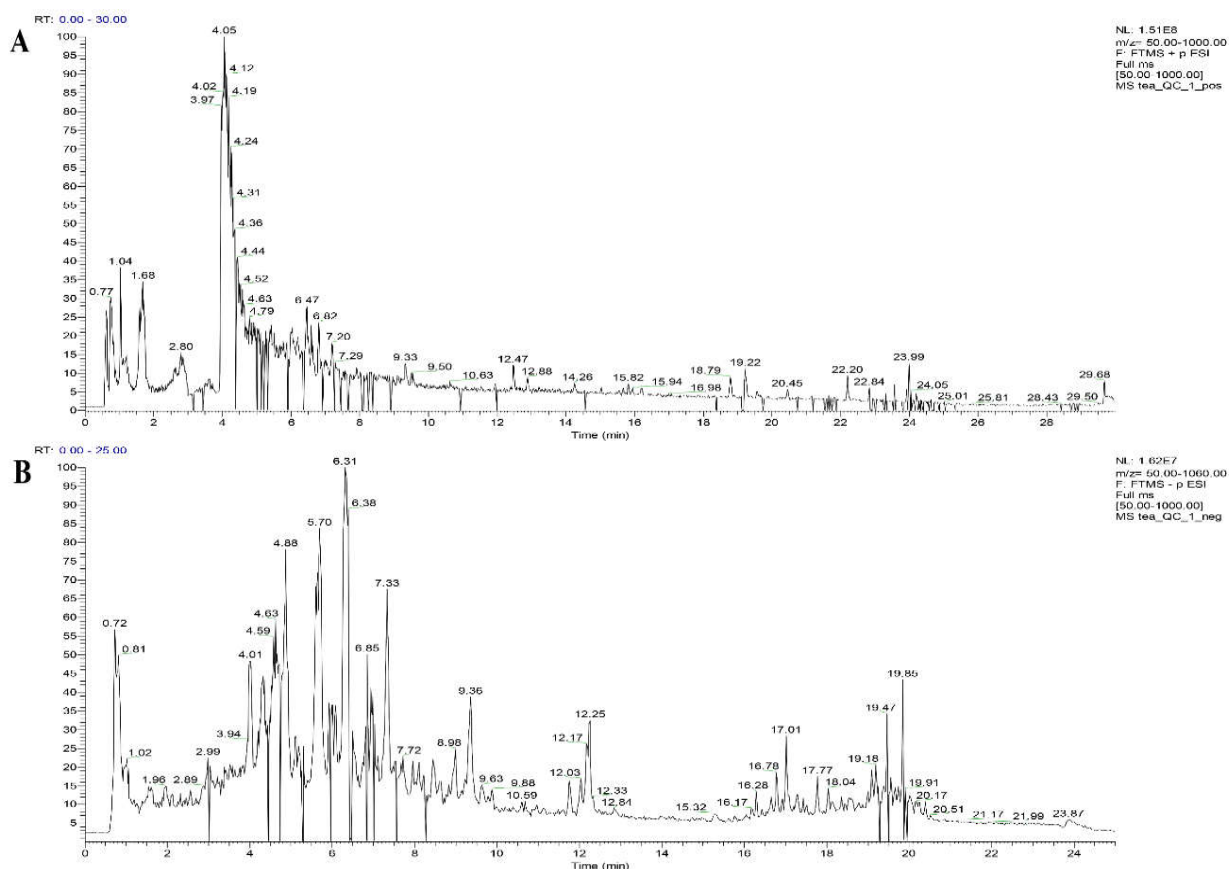

**Figure 1.** The total ion chromatogram (TIC) of UHPLC-Orbitrap-MS/MS in ZJT. (A): positive ion mode, (B): negative ion mode.

**Table S1.** Contents of catechins and caffeine in ZJT and YKT (%) ( $n = 3$ , mean  $\pm$  SEM).

| Sample         | YKT                | ZJT                  |
|----------------|--------------------|----------------------|
| EGC            | 1.439 $\pm$ 0.093  | 1.891 $\pm$ 0.164    |
| C              | 0.253 $\pm$ 0.065  | 0.577 $\pm$ 0.109 #  |
| EC             | 0.668 $\pm$ 0.039  | 1.229 $\pm$ 0.100 ## |
| EGCG           | 12.500 $\pm$ 1.048 | 7.194 $\pm$ 0.709 ** |
| ECG            | 3.282 $\pm$ 0.273  | 3.426 $\pm$ 0.343    |
| Caffeine       | 4.051 $\pm$ 0.307  | 3.792 $\pm$ 0.320    |
| Total catechin | 18.370 $\pm$ 1.524 | 14.400 $\pm$ 1.425   |

Note: EGC, (-)-epigallocatechin; C, (+)-Catechin; EC, (-)-epi-catechin; EGCG, (-)-epigallocatechin gallate; ECG, (-)-epicatechin gallate; #  $p < 0.05$ , ##  $p < 0.01$ , less content than ZJT; \*\*  $p < 0.01$ , more content than ZJT.
